# Supplementary material for: Four genes essential for recombination define GInts, a new type of mobile genomic island widespread in bacteria
Source: PubMed Central journal article supplement (PMC5385486; doi:10.1038/srep46254), 2017-04-10
Supplement: srep46254-s1.pdf [file srep46254-s1.pdf]

# SUPPLEMENTARY FIGURES AND TABLES

## Four genes essential for recombination define GInts, a new type of mobile genomic island widespread in bacteria

Leire Bardaji,<sup>1</sup> Myriam Echeverría,<sup>1</sup> Pablo Rodríguez-Palenzuela,<sup>2</sup> Pedro M. Martínez-García,<sup>2,3</sup> Jesús Murillo<sup>1\*</sup>

<sup>1</sup> Departamento de Producción Agraria, Escuela Técnica Superior de Ingenieros Agrónomos, Universidad Pública de Navarra, 31006 Pamplona, Spain

<sup>2</sup> Centro de Biotecnología y Genómica de Plantas, E.T.S. Ingenieros Agrónomos, Universidad Politécnica de Madrid, Campus de Montegancedo, E-28223 Pozuelo de Alarcón, Madrid, Spain

<sup>3</sup> Instituto de Hortofruticultura Subtropical y Mediterránea “La Mayora”, Universidad de Málaga-Consejo Superior de Investigaciones Científicas (IHSM-UMA-CSIC), Área de Genética, Facultad de Ciencias, Campus Teatinos s/n, 29010 Málaga, Spain

\*For correspondence: Jesús Murillo, E-mail: [jesus.murillo@unavarra.es](mailto:jesus.murillo@unavarra.es)

**Supplementary Figure S1.** Conservation of key amino acid residues in GinA, GinB and GinC proteins and their mutated sequences.

**Supplementary Figure S2.** GInts are exchanged horizontally among pseudomonads.

**Supplementary Figure S3.** GInts acquire the cargo DNA mainly from closely related bacteria.

**Supplementary Table S1.** Characteristics of representative GInts highly related to that from *Ps* pv. *phaseolicola* 1448A (Pht-PAI).

**Supplementary Table S2.** Circularisation of GInts and sequence of the resulting *attB* and *attI* sites in selected strains.

**Supplementary Table S3.** Examples of GInts found in different taxonomical groups of bacteria.

**Supplementary Table S4.** Examples of significant clusters of genes found in the cargo DNA of diverse GInts.

**Supplementary Table S5.** Bacterial strains and plasmids used in this study.

**Supplementary Table S6.** Primers used in this study.

|       |     |   |     |   |   |   |   |   |   |   |   |   |   |   |   |   |   |   |   |   |   |   |   |   |   |   |   |   |   |   |   |   |   |   |   |   |   |   |   |   |   |   |   |   |   |   |   |   |   |   |   |   |   |   |   |   |   |   |   |   |
|-------|-----|---|-----|---|---|---|---|---|---|---|---|---|---|---|---|---|---|---|---|---|---|---|---|---|---|---|---|---|---|---|---|---|---|---|---|---|---|---|---|---|---|---|---|---|---|---|---|---|---|---|---|---|---|---|---|---|---|---|---|---|
|       | 181 |   | 240 |   |   |   |   |   |   |   |   |   |   |   |   |   |   |   |   |   |   |   |   |   |   |   |   |   |   |   |   |   |   |   |   |   |   |   |   |   |   |   |   |   |   |   |   |   |   |   |   |   |   |   |   |   |   |   |   |   |
| GinA  | R   | T | R   | L | L | E | I | M | H | P | D | S | A | E | N | P | F | S | D | E | A | I | R | L | R | N | Y | I | I | L | L | L | G | I | D | M | G | L | R | R | S | E | M | L | L | I | K | T | S | D | I | H | W | H | S | R | Q | L | A | V |
| GinA' | R   | T | R   | L | L | E | I | M | H | P | D | S | A | E | N | P | F | S | D | E | A | I | R | L | R | N | Y | I | I | L | L | L | G | I | D | M | G | L | R | R | S | E | M | L | L | I | K | T | S | D | I | H | W | H | S | R | Q | L | A | V |

  

|       |     |   |     |   |   |   |   |   |   |   |   |   |   |   |   |   |   |   |   |   |   |   |   |   |   |   |   |   |   |   |   |   |   |   |   |   |   |   |   |   |   |   |   |   |   |   |   |   |   |   |   |   |   |   |   |   |   |   |   |   |
|-------|-----|---|-----|---|---|---|---|---|---|---|---|---|---|---|---|---|---|---|---|---|---|---|---|---|---|---|---|---|---|---|---|---|---|---|---|---|---|---|---|---|---|---|---|---|---|---|---|---|---|---|---|---|---|---|---|---|---|---|---|---|
|       | 241 |   | 300 |   |   |   |   |   |   |   |   |   |   |   |   |   |   |   |   |   |   |   |   |   |   |   |   |   |   |   |   |   |   |   |   |   |   |   |   |   |   |   |   |   |   |   |   |   |   |   |   |   |   |   |   |   |   |   |   |   |
| GinA  | V   | N | L   | E | D | E | S | L | D | P | R | T | M | A | P | Q | F | K | T | H | E | R | M | L | V | M | T | D | D | L | Y | D | A | I | T | E | Y | E | S | K | Y | R | H | R | K | P | R | S | G | T | S | Q | A | R | R | H | P | F | L | L |
| GinA' | V   | N | L   | E | D | E | S | L | D | P | R | T | M | A | P | Q | F | K | T | H | E | R | M | L | V | M | T | D | D | L | Y | D | A | I | T | E | Y | E | S | K | Y | R | H | R | K | P | R | S | G | T | S | Q | A | R | R | H | P | F | L | L |

  

|       |     |   |     |   |   |   |   |   |   |   |   |   |   |   |   |   |   |   |   |   |   |   |   |   |   |   |   |   |   |   |   |   |   |   |   |   |   |   |   |   |   |   |   |   |   |   |   |   |   |   |   |   |   |   |   |   |   |   |   |   |
|-------|-----|---|-----|---|---|---|---|---|---|---|---|---|---|---|---|---|---|---|---|---|---|---|---|---|---|---|---|---|---|---|---|---|---|---|---|---|---|---|---|---|---|---|---|---|---|---|---|---|---|---|---|---|---|---|---|---|---|---|---|---|
|       | 301 |   | 360 |   |   |   |   |   |   |   |   |   |   |   |   |   |   |   |   |   |   |   |   |   |   |   |   |   |   |   |   |   |   |   |   |   |   |   |   |   |   |   |   |   |   |   |   |   |   |   |   |   |   |   |   |   |   |   |   |   |
| GinA  | V   | A | H   | K | R | N | E | G | G | P | L | T | I | K | A | V | D | G | V | L | S | R | V | R | E | I | A | P | E | L | A | H | V | H | T | H | I | L | R | H | D | A | V | Y | T | M | L | - | E | S | M | R | E | E | L | A | A | L | T | P |
| GinA' | V   | A | H   | K | R | N | E | G | G | P | L | T | I | K | A | V | D | G | V | L | S | R | V | R | E | I | A | P | E | L | A | H | V | H | T | H | I | L | R | H | D | A | V | S | T | R | C | W | K | A | C | V | R | N | W | Q | R | L | H | R |

  

|       |     |   |     |   |   |   |   |   |   |   |   |   |   |   |   |   |   |   |   |   |   |   |   |   |   |   |   |   |   |   |   |   |   |   |   |   |   |   |   |   |   |   |   |   |   |   |   |   |   |   |   |   |   |   |   |   |   |   |   |   |
|-------|-----|---|-----|---|---|---|---|---|---|---|---|---|---|---|---|---|---|---|---|---|---|---|---|---|---|---|---|---|---|---|---|---|---|---|---|---|---|---|---|---|---|---|---|---|---|---|---|---|---|---|---|---|---|---|---|---|---|---|---|---|
|       | 361 |   | 420 |   |   |   |   |   |   |   |   |   |   |   |   |   |   |   |   |   |   |   |   |   |   |   |   |   |   |   |   |   |   |   |   |   |   |   |   |   |   |   |   |   |   |   |   |   |   |   |   |   |   |   |   |   |   |   |   |   |
| GinA  | E   | D | R   | T | T | Q | I | Q | K | T | L | T | W | M | F | G | W | S | P | D | S | N | M | P | G | H | Y | G | A | K | F | W | K | E | E | A | D | K | A | I | Q | K | R | - | A | K | R | F | T | A | I | R | Q | K | A | G | T | T | Q | G |
| GinA' | R   | I | A   | P | L | K | F | K | R | H | S | H | G | S | A | G | V | P | T | R | T | C | P | A | T | A | R | N | S | G | R | K | R | Q | T | R | R | Y | R | K | G | P | S | D | S | R | P | S | V | R | R | P | A | R | H | K | E | V |   |   |

|       |     |   |     |   |   |   |   |   |   |   |   |   |   |   |   |   |   |   |   |   |   |   |   |   |   |   |   |   |   |   |   |   |   |   |   |   |   |   |   |   |   |   |   |   |   |   |   |   |   |   |   |   |   |   |   |   |
|-------|-----|---|-----|---|---|---|---|---|---|---|---|---|---|---|---|---|---|---|---|---|---|---|---|---|---|---|---|---|---|---|---|---|---|---|---|---|---|---|---|---|---|---|---|---|---|---|---|---|---|---|---|---|---|---|---|---|
|       | 181 |   | 240 |   |   |   |   |   |   |   |   |   |   |   |   |   |   |   |   |   |   |   |   |   |   |   |   |   |   |   |   |   |   |   |   |   |   |   |   |   |   |   |   |   |   |   |   |   |   |   |   |   |   |   |   |   |
| GinB  | I   | H | E   | Q | F | C | H | G | L | G | F | E | Q | Y | L | Y | L | R | M | I | Y | G | Q | R | G | T | Q | V | R | M | M | V | F | G | D | F | T | K | G | D | Q | G | C | K | V | R | F | H | W | A | K | Q | N | D | E | A |
| GinB' | I   | H | E   | Q | F | C | H | G | L | G | F | E | Q | Y | L | Y | L | R | M | I | Y | G | Q | R | G | T | Q | V | R | M | M | V | F | G | D | F | T | K | G | D | Q | G | C | K | V | R | F | H | W | A | K | Q | N | D | E | A |

  

|       |     |   |     |   |   |   |   |   |   |   |   |   |   |   |   |   |   |   |   |   |   |   |   |   |   |   |   |   |   |   |   |   |   |   |   |   |   |   |   |   |   |   |   |   |   |   |   |   |   |   |   |   |   |   |   |   |   |   |
|-------|-----|---|-----|---|---|---|---|---|---|---|---|---|---|---|---|---|---|---|---|---|---|---|---|---|---|---|---|---|---|---|---|---|---|---|---|---|---|---|---|---|---|---|---|---|---|---|---|---|---|---|---|---|---|---|---|---|---|---|
|       | 241 |   | 300 |   |   |   |   |   |   |   |   |   |   |   |   |   |   |   |   |   |   |   |   |   |   |   |   |   |   |   |   |   |   |   |   |   |   |   |   |   |   |   |   |   |   |   |   |   |   |   |   |   |   |   |   |   |   |   |
| GinB  | G   | W | R   | A | K | A | E | T | F | S | L | D | E | G | L | Y | N | T | V | Q | A | Y | K | A | M | V | L | A | Q | L | W | Q | T | P | D | G | A | D | W | N | A | A | I | E | N | V | P | V | F | R | K | L | D | G | E | T | G | A |
| GinB' | G   | W | R   | A | K | A | E | T | F | S | L | D | E | G | L | Y | N | T | V | Q | A | Y | K | A | M | V | L | A | Q | L | W | Q | T | P | D | G | A | D | W | N | A | A | I | E | N | V | P | V | F | R | K | L | D | G | E | T | G | G |

  

|       |     |   |     |   |   |   |   |   |   |   |   |   |   |   |   |   |   |   |   |   |   |   |   |   |   |   |   |   |   |   |   |   |   |   |   |   |   |   |   |   |   |   |   |   |   |   |   |   |   |   |   |   |   |   |   |   |   |   |   |
|-------|-----|---|-----|---|---|---|---|---|---|---|---|---|---|---|---|---|---|---|---|---|---|---|---|---|---|---|---|---|---|---|---|---|---|---|---|---|---|---|---|---|---|---|---|---|---|---|---|---|---|---|---|---|---|---|---|---|---|---|---|
|       | 301 |   | 360 |   |   |   |   |   |   |   |   |   |   |   |   |   |   |   |   |   |   |   |   |   |   |   |   |   |   |   |   |   |   |   |   |   |   |   |   |   |   |   |   |   |   |   |   |   |   |   |   |   |   |   |   |   |   |   |   |
| GinB  | R   | D | R   | V | N | P | P | V | L | L | D | T | P | L | Q | K | A | E | D | A | P | Q | P | T | F | H | I | G | S | S | T | I | K | R | W | L | E | C | I | E | R | M | K | G | F | P | V | S | P | R | T | H | Q | P | L | K | V | T | R |
| GinB' | I   | G | *   |   |   |   |   |   |   |   |   |   |   |   |   |   |   |   |   |   |   |   |   |   |   |   |   |   |   |   |   |   |   |   |   |   |   |   |   |   |   |   |   |   |   |   |   |   |   |   |   |   |   |   |   |   |   |   |   |

  

|      |     |   |     |   |   |   |   |   |   |   |   |   |   |   |   |   |   |   |   |   |   |   |   |   |   |   |   |   |   |   |   |   |   |   |   |   |   |   |   |   |   |   |   |   |   |   |   |   |   |   |   |   |   |   |   |   |   |
|------|-----|---|-----|---|---|---|---|---|---|---|---|---|---|---|---|---|---|---|---|---|---|---|---|---|---|---|---|---|---|---|---|---|---|---|---|---|---|---|---|---|---|---|---|---|---|---|---|---|---|---|---|---|---|---|---|---|---|
|      | 361 |   | 420 |   |   |   |   |   |   |   |   |   |   |   |   |   |   |   |   |   |   |   |   |   |   |   |   |   |   |   |   |   |   |   |   |   |   |   |   |   |   |   |   |   |   |   |   |   |   |   |   |   |   |   |   |   |   |
| GinB | G   | H | R   | F | R | H | T | L | G | T | D | L | S | N | A | G | L | D | E | W | T | M | A | R | A | L | M | H | K | N | T | Q | A | V | R | K | Y | R | A | V | S | P | E | L | L | I | D | A | K | M | S | D | H | L | A | L | V |

|       |    |   |     |   |   |   |   |   |   |   |   |   |   |   |   |   |   |   |   |   |   |   |   |   |   |   |   |   |   |   |   |   |   |   |   |   |   |   |   |   |   |   |   |   |   |   |   |   |   |   |   |   |   |   |   |   |   |   |   |
|-------|----|---|-----|---|---|---|---|---|---|---|---|---|---|---|---|---|---|---|---|---|---|---|---|---|---|---|---|---|---|---|---|---|---|---|---|---|---|---|---|---|---|---|---|---|---|---|---|---|---|---|---|---|---|---|---|---|---|---|---|
|       | 61 |   | 120 |   |   |   |   |   |   |   |   |   |   |   |   |   |   |   |   |   |   |   |   |   |   |   |   |   |   |   |   |   |   |   |   |   |   |   |   |   |   |   |   |   |   |   |   |   |   |   |   |   |   |   |   |   |   |   |   |
| GinC  | A  | L | G   | S | T | K | A | A | P | K | A | M | Q | A | P | F | T | E | F | A | K | A | I | L | V | Y | R | R | V | Y | L | Q | K | A | M | T | D | W | L | R | A | M | I | A | L | E | F | A | L | F | E | L | T | G | T | R | D | V | T |
| GinC' | A  | L | G   | S | T | K | A | A | P | K | A | M | Q | A | P | F | T | E | F | A | K | A | I | L | V | Y | R | R | V | Y | L | Q | K | A | M | T | D | W | L | R | A | M | I | A | L | E | L | I | R | P | V | R | V | D | R | H | A | G | C |

  

|       |     |   |     |   |   |   |   |   |   |   |   |   |   |   |   |   |   |   |   |   |   |   |   |   |   |   |   |   |   |   |   |   |   |   |   |   |   |   |   |   |   |   |   |   |   |   |   |   |   |   |   |   |   |   |   |   |   |
|-------|-----|---|-----|---|---|---|---|---|---|---|---|---|---|---|---|---|---|---|---|---|---|---|---|---|---|---|---|---|---|---|---|---|---|---|---|---|---|---|---|---|---|---|---|---|---|---|---|---|---|---|---|---|---|---|---|---|---|
|       | 121 |   | 180 |   |   |   |   |   |   |   |   |   |   |   |   |   |   |   |   |   |   |   |   |   |   |   |   |   |   |   |   |   |   |   |   |   |   |   |   |   |   |   |   |   |   |   |   |   |   |   |   |   |   |   |   |   |   |
| GinC  | R   | V | S   | A | A | V | C | N | K | A | C | E | H | L | N | R | H | W | T | K | G | N | T | A | Y | Q | H | L | A | L | E | A | L | I | T | L | M | R | A | K | L | L | K | S | D | F | R | W | T | S | P | L | T | M | P | L | G |
| GinC' | D   | A | G   | V | R | R | C | L | * |   |   |   |   |   |   |   |   |   |   |   |   |   |   |   |   |   |   |   |   |   |   |   |   |   |   |   |   |   |   |   |   |   |   |   |   |   |   |   |   |   |   |   |   |   |   |   |   |

  

|      |     |   |     |   |   |   |   |   |   |   |   |   |   |   |   |   |   |   |   |   |   |   |   |   |   |   |   |   |   |   |   |   |   |   |   |   |   |   |   |   |   |   |   |   |   |   |   |   |   |   |   |   |   |   |   |   |   |   |   |
|------|-----|---|-----|---|---|---|---|---|---|---|---|---|---|---|---|---|---|---|---|---|---|---|---|---|---|---|---|---|---|---|---|---|---|---|---|---|---|---|---|---|---|---|---|---|---|---|---|---|---|---|---|---|---|---|---|---|---|---|---|
|      | 481 |   | 540 |   |   |   |   |   |   |   |   |   |   |   |   |   |   |   |   |   |   |   |   |   |   |   |   |   |   |   |   |   |   |   |   |   |   |   |   |   |   |   |   |   |   |   |   |   |   |   |   |   |   |   |   |   |   |   |   |
| GinC | N   | L | K   | K | T | S | L | F | A | R | Y | G | Y | P | G | V | K | V | N | T | H | A | F | R | H | E | L | N | T | R | M | H | Q | A | G | L | S | Q | L | L | I | D | A | F | S | G | R | T | T | R | G | S | V | N | H | E | T | I | E |

**Supplementary Figure S1. Conservation of key amino acid residues in GinA, GinB and GinC proteins and their mutated sequences.** Pairwise alignment of GinA, GinB and GinC proteins from *P. stutzeri* DSM4166 with the deduced products of the corresponding mutant genes (from strains UPN821, UPN823, and UPN825), indicated with an apostrophe; for clarity, only part of the alignments are shown. Amino acid residues before the out-of-frame mutations appear in red. Residues boxed in grey correspond to those conserved in at least 90 % of the homologues from the Psi-Blast analysis carried out by Phyre2 (1000 sequences were aligned). Numbers indicate amino acid positions. An asterisk indicate the end of the protein.

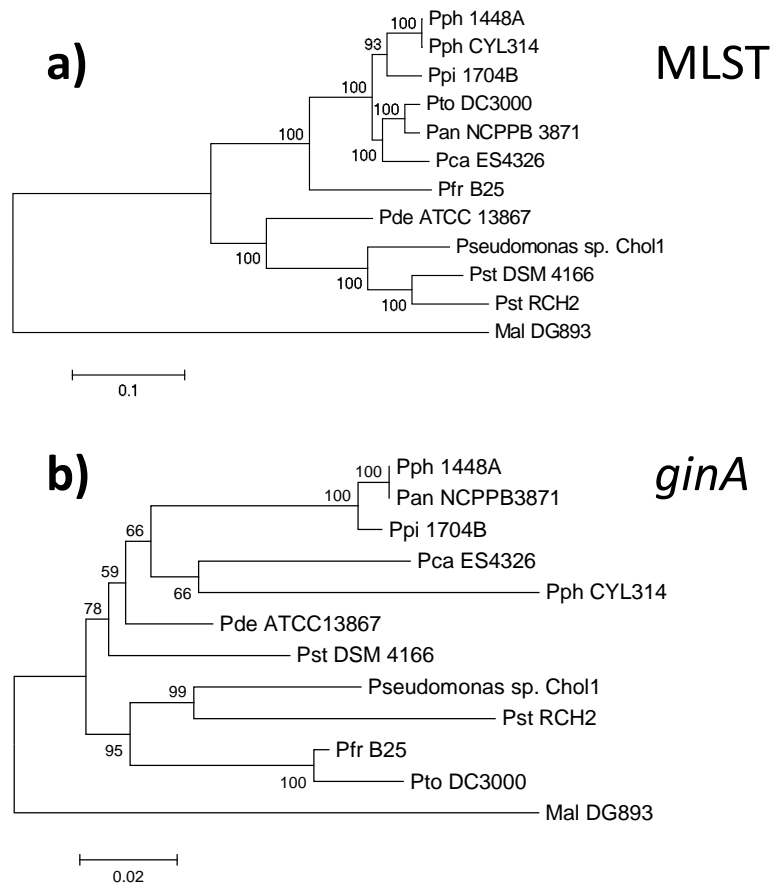

**Supplementary Figure S2. GlntS are exchanged horizontally among pseudomonads.** Phylogenetic analyses were done with selected GlntS whose *gin* operons showed an overall nucleotide identity higher than 70 % to that from the Pht-PAI of *P. syringae* pv. phaseolicola 1448A (see Table S1). Maximum likelihood trees were constructed with concatenated partial or complete sequences of *rpoD*, *gyrB*, *acnB*, *gap1* and *gltA* (**a**) and the complete nucleotide sequence of *ginA* (**b**), based on the General Time Reversible model. Trees constructed separately using the sequences from *ginB*, *ginC*, and *ginD* showed a topology similar to that of *ginA* and are not shown for simplicity. Trees are drawn to scale, with branch lengths measured in the number of substitutions per site. Numbers in branches indicate per cent bootstrap values with 500 replicates. Abbreviations: Mal, *Marinobacter algicola*; Pan, *Pseudomonas syringae* pv. actinidiae; Pca, *P. cannabina* pv. alisalensis; Pde, *P. denitrificans*; Pfr, *P. fragi*; Pph, *P. syringae* pv. phaseolicola; Ppi, *P. syringae* pv. pisi; Pst, *P. stutzeri*; Pto, *P. syringae* pv. tomato.

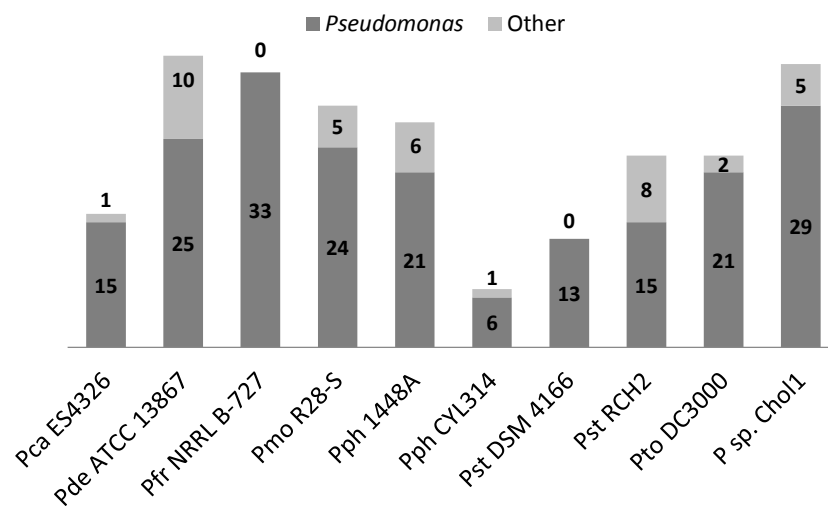

**Supplementary Figure S3. Glnts acquire the cargo DNA mainly from closely related bacteria.** The CDSs from the cargo DNA of Glnts from strains of *Pseudomonas* (Table S1) was analysed using blastp. Bars are proportional to the number of proteins whose closest homologue was found in other *Pseudomonas* species (dark grey) or in bacteria from other genera (light grey), with total number of proteins for each category shown within or above bars. Abbreviations: Pca, *Pseudomonas cannabina* pv. alisalensis; Pde, *P. denitrificans*; Pfr, *P. fragi*; Pmo, *P. moraviensis*; Pph, *P. syringae* pv. phaseolicola; Pst, *P. stutzeri*; Pto, *P. syringae* pv. tomato. P sp., *Pseudomonas* sp. Chol1.

**Supplementary Table S1. Characteristics of representative Glnts highly related to that from *Ps* pv. *phaseolicola* 1448A (Pht-PAI).<sup>a</sup>**

| Species                                           | Strain     | Acc. no.     | <i>gin</i> operon                       | Cargo DNA                               | Size (kb) | % id. <sup>b</sup> | Status <sup>c</sup> |
|---------------------------------------------------|------------|--------------|-----------------------------------------|-----------------------------------------|-----------|--------------------|---------------------|
| <b><i>Pseudomonas syringae</i></b>                |            |              |                                         |                                         |           |                    |                     |
| pv. <i>phaseolicola</i> <sup>d</sup>              | 1448A      | CP000058     | PSPPH_4294/<br>PSPPH_4297               | PSPPH_4298/<br>PSPPH_4324               | 38.0      | -                  | complete            |
|                                                   | CYL314     | LT671994     | CYL314_016/<br>CYL314_019               | CYL314_020/<br>CYL314_028               | 15.6      | 70.7               | complete            |
| pv. <i>tomato</i>                                 | DC3000     | AE016853     | PSPTO_4603/<br>PSPTO_4606               | PSPTO_4607/<br>PSPTO_4630               | 34.8      | 86.7               | Complete            |
| pv. <i>pisi</i>                                   | 1704B      | GL384900     | PSYPI_04159/<br>PSYPI_04144             | PSYPI_04139/ unk <sup>e</sup>           | unk       | 97.5               | Incomplete          |
| <b><i>Pseudomonas</i> sp.</b>                     |            |              |                                         |                                         |           |                    |                     |
|                                                   | Chol1      | AMSL01000014 | C211_02301/<br>C211_02316               | C211_02321/<br>C211_02486               | 43.5      | 86.0               | complete            |
| <b><i>P. cannabina</i> pv. <i>alisalensis</i></b> |            |              |                                         |                                         |           |                    |                     |
|                                                   | ES4326     | NZ_GL385049  | PMA4326_RS23690/<br>PMA4326_RS23705     | PMA4326_RS23710/<br>PMA4326_RS23775     | ≥18.9     | 88.0               | incomplete          |
| <b><i>P. chloritidismutans</i></b>                |            |              |                                         |                                         |           |                    |                     |
|                                                   | AW-1       | AOFQ01000065 | F753_21675/<br>F753_21690               | F753_21695/<br>F753_21815               | ≥31.8     | 86.9               | incomplete          |
| <b><i>P. denitrificans</i></b>                    |            |              |                                         |                                         |           |                    |                     |
|                                                   | ATCC 13867 | CP004143     | H681_04555 /<br>H681_04540              | H681_04535 /<br>H681_04370              | 47.8      | 88.2               | complete            |
| <b><i>P. fragi</i></b>                            |            |              |                                         |                                         |           |                    |                     |
|                                                   | B25        | NZ_JH604622  | O5A_RS0101405/<br>O5A_RS0101390         | O5A_RS0101385/<br>O5A_RS0101225         | ≥34.9     | 86.0               | incomplete          |
|                                                   | NRRL B-727 | LT629783     | SAMN05216594_3852/<br>SAMN05216594_3849 | SAMN05216594_3848/<br>SAMN05216594_3815 | 35.2      | 86.1               | complete            |
| <b><i>P. moraviensis</i></b>                      |            |              |                                         |                                         |           |                    |                     |
|                                                   | R28-S      | CM002330     | PMO01_23370/<br>PMO01_23385             | PMO01_23390/<br>PMO01_23530             | 35.6      | 63.7               | complete            |
| <b><i>P. stutzeri</i></b>                         |            |              |                                         |                                         |           |                    |                     |
|                                                   | DSM 4166   | CP002622     | PSTAA_0885/<br>PSTAA_0887               | PSTAA_0888/<br>PSTAA_0900               | 23.8      | 87.0               | complete            |

|                                        |           |              |                               |                               |      |      |            |
|----------------------------------------|-----------|--------------|-------------------------------|-------------------------------|------|------|------------|
|                                        | RCH2      | CP003071     | Psest_3432/<br>Psest_3429     | Psest_3428/<br>Psest_3405     | 29.2 | 86.0 | complete   |
| <b><i>Hahella ganghwensis</i></b>      | DSM 17046 | AQXX01000141 | F566_27925/<br>F566_27910     | F566_27905/<br>F566_27860     | 17.3 | 63.9 | complete   |
| <b><i>Marinobacter algicola</i></b>    | DG893     | ABCP01000041 | MDG893_13179/<br>MDG893_13164 | MDG893_13159/<br>MDG893_13054 | ≥27  | 79.0 | incomplete |
| <b><i>Teredinibacter turnereae</i></b> | T7902     | NZ_KB900633  | YUK_04735/<br>YUK_04750       | YUK_04755/<br>YUK_04930       | 52.6 | 51.7 | complete   |

<sup>a</sup> We include here GInts whose entire *gin* operon shows nucleotide identities higher than 50 % with that of *P. syringae* pv. phaseolicola 1448A. The *gin* operon from strain CYL314 contains a large internal deletion affecting *ginB* and *ginC* and resulting in a lower identity score.

<sup>b</sup> Percentage of nucleotide identity between the *gin* operon from this element and that from *P. syringae* pv. phaseolicola 1448A in pairwise global comparisons using the Needle tool from EMBOSS (Needleman-Wunsch algorithm; <http://www.ebi.ac.uk/Tools/emboss/>).

<sup>c</sup> Complete indicates that we were able to identify a continuous assembly including the 3' end of the GInt, which was generally detected by genome comparisons with closely related bacteria. Incomplete GInts are the result of incomplete assemblies or difficulties in unambiguously identifying the poorly conserved 3' end.

<sup>d</sup> The Pht-PAI is present as a nearly identical copy in all strains of *P. syringae* pv. phaseolicola and *P. syringae* pv. actinidiae that produce phaseolotoxin. The genomes of these strains are not mentioned here for clarity.

<sup>e</sup> unk, unknown

**Supplementary Table S2. Circularisation of GInts and sequence of the resulting *attB* and *attI* sites in selected strains.**

| Strains                                    | <i>attI</i> / <i>attB</i> <sup>a</sup> | <i>attL</i> and <i>attR</i> of GInts <sup>b</sup> | Reconstructed <i>attI</i> <sup>c</sup>        | Reconstructed <i>attB</i> <sup>c</sup>                                    |
|--------------------------------------------|----------------------------------------|---------------------------------------------------|-----------------------------------------------|---------------------------------------------------------------------------|
| <i>Pseudomonas syringae</i>                |                                        |                                                   |                                               |                                                                           |
| pv. phaseolicola 1448A                     | YES / NO                               | L tgtagaCGTA-AGAGCCtgt<br>R gatatcCGTATTGAGCCatg  | gatagaCGTAAGAGCCtgt                           |                                                                           |
| pv. pisi 1704B                             | YES / YES                              | L tgtagaCGTA-AGAGCCtgt<br>R gatatcCGTATTGAGCCatg  | gatagaCGTAAGAGCCtgt                           | tgtatcCGTATTGAGCCatg or<br>tgt--CCGTATTGAGCCatg or<br>tgt-----ATTGAGCCatg |
| pv. tomato DC3000                          | YES / YES                              | L tgtagaCGTA-AGAGCCtgt<br>R gataccGATATTGAGCCatg  | gatagaCGTAAGAGCCtgt                           | tgtagaCGTATTGAGCCatg                                                      |
| <i>P. cannabina</i> pv. alisalensis ES4326 | YES / YES                              | L tgtagaCGTA-AGAGCCtgt<br>R gatggcTCTATTGAGCCatg  | gatagaCGTAAGAGCCtgt                           | tgtggcTCTATTGAGCCatg                                                      |
| <i>P. fragi</i> B25                        | YES / NO                               | L tgaaaaCGTA-AGAGCCtgt<br>R gataagCGTATTGAGCCatg  | gataaaCGTAAGAGCCtgt                           |                                                                           |
| <i>P. stutzeri</i> DSM4166                 | YES / NO                               | L tgtagaCGTA-AGAGCCggt<br>R gattgaTGAATTGAGCCatg  | gatagaCGTAAGAGCCggt or<br>gattgaTGAAAGAGCCggt |                                                                           |
| <i>P. putida</i> KT2440::pGInt0            | YES / YES                              | L tgtagaCGTA-AGAGCCggt<br>R gattgaTGAATTGAGCCaaa  | gatagaCGTAAGAGCCggt or<br>gattgaTGAAAGAGCCggt | tgtagaCGTATTGAGCCaaa                                                      |

<sup>a</sup> YES and NO indicate whether or not the circular intermediate (*attI*) and the scar (*attB*) were detected by PCR.

<sup>b</sup> L and R indicate the putative left and right borders of the GInt, respectively. Dashes indicate gaps introduced to maximize the alignment

<sup>c</sup> Sequences shaded in orange and grey originate from the GInt and the bacterium, respectively. Dashes indicate gaps introduced to maximize the alignment.

**Supplementary Table S3. Examples of GlntS found in different taxonomical groups of bacteria.<sup>a</sup>**

| Class / Order/ Strain                        | Accession no.     | Inserted in gene/product <sup>b</sup> | <i>ginA</i> , Locus_tag | Size of Glnt (kb) | <i>attL-attR<sup>c</sup></i>       |
|----------------------------------------------|-------------------|---------------------------------------|-------------------------|-------------------|------------------------------------|
| <b>PHYLUM Bacteroidetes</b>                  |                   |                                       |                         |                   |                                    |
| <b>Flavobacteria/ Flavobacteriales/</b>      |                   |                                       |                         |                   |                                    |
| <i>Chryseobacterium artocarp</i> UTM-3       | NZ_MAYH01000023.1 | <i>ssb</i>                            | BBI01_07255             | ND                | ND                                 |
| <b>PHYLUM Firmicutes</b>                     |                   |                                       |                         |                   |                                    |
| <b>Clostridia/ Clostridiales/</b>            |                   |                                       |                         |                   |                                    |
| <i>Roseburia inulinivorans</i> DSM 16841     | ACFY01000093      | ATP-dependent DNA helicase            | ROSEINA2194_02362       | ND                | ND                                 |
| <b>Erysipelotrichia/ Erysipelotrichales/</b> |                   |                                       |                         |                   |                                    |
| <i>Eubacterium cylindroides</i> T2-87        | NC_021019         | Rad3-related DNA helicase             | EC1_RS04255             | ND                | ND                                 |
| <b>PHYLUM Verrucomicrobia</b>                |                   |                                       |                         |                   |                                    |
| <b>Opitutae/ Opitutales/</b>                 |                   |                                       |                         |                   |                                    |
| <i>Opitutus terrae</i> PB90                  | CP001032          | <i>ssb</i>                            | Oter_2289               | 9.7               | L:GTGCCGTTCT<br>R:GTGCCGTTCT       |
| <b>PHYLUM Proteobacteria</b>                 |                   |                                       |                         |                   |                                    |
| <b>Alphaproteobacteria/ Rhizobiales/</b>     |                   |                                       |                         |                   |                                    |
| <i>Methylobacterium populi</i> BJ001         | CP001029          | O-acyl transferase                    | Mpop_3234               | 8.3               | L:GCCGAAAACGGAT<br>R:GCCGAGAACGGAT |
| <b>Betaproteobacteria/ Burkholderiales/</b>  |                   |                                       |                         |                   |                                    |
| <i>Ralstonia solanacearum</i> PSI07          | FP885906          | <i>ssb</i>                            | RPSI07_2980             | 35.0              | L:CCGTTCTAAT<br>R:CCGTTTTGAAT      |



**Gammaproteobacteria/ Alteromonadales/**

|                                 |          |            |              |      |                                     |
|---------------------------------|----------|------------|--------------|------|-------------------------------------|
| <i>Shewanella baltica</i> BA175 | CP002767 | <i>ssb</i> | Sbal175_0650 | 75.8 | L : CCGTTTTTAATT<br>R : CCTTTTTAATT |
|---------------------------------|----------|------------|--------------|------|-------------------------------------|

**Gammaproteobacteria/ Pseudomonadales/**

|                                                 |             |                                                              |                     |      |                                          |
|-------------------------------------------------|-------------|--------------------------------------------------------------|---------------------|------|------------------------------------------|
| <i>Pseudomonas aeruginosa</i> PA_D16            | CP012581    | ribonucleoside-<br>diphosphate<br>reductase<br>subunit alpha | GInt_1; A6695_20385 | 40.3 | L : TGCCAGTGAGCCCG<br>R : TGCCAGTGATCGCG |
|                                                 |             |                                                              | GInt_2; A6695_21830 | 35.3 | L : TGCCAGTGAGCCC<br>R : TGCCA-TGATCGC   |
| <i>P. syringae</i> pv. <i>syringae</i> UMAF0158 | CP005970    | <i>ssb</i>                                                   | PSYRMG_13425        | 19.7 |                                          |
| <i>P. syringae</i> pv. <i>myricae</i> AZ84488   | LGLA0100042 | <i>ssb</i>                                                   | AC510_0694          | 30.7 |                                          |

**Gammaproteobacteria/ Vibrionales/**

|                                             |          |                             |        |      |                                      |
|---------------------------------------------|----------|-----------------------------|--------|------|--------------------------------------|
| <i>Vibrio parahaemolyticus</i> RIMD 2210633 | BA000031 | DNA-binding<br>protein HU-2 | VP2910 | 15.7 | L : TGATTCTTTCAG<br>R : TGCTTCTTTCAG |
|---------------------------------------------|----------|-----------------------------|--------|------|--------------------------------------|

<sup>a</sup> In all cases the *gin* operon was found to be associated to region of cargo DNA, of variable size, whose presence was deduced by comparison with the genome of the closest relative without GInt. Sizes of GInts are in kb. ND: not determined; the ends of the GInt could not be determined because its DNA is not assembled into a continuous contig, because the ends are degenerate, with deletions or insertions of other mobile elements, or because the ends could not be accurately defined by comparison with an appropriate genome lacking the GInt.

<sup>b</sup> All *ssb* genes are homologous.

<sup>c</sup> Deduced Left (L) and right (R) direct imperfect repeats bordering the GInts, but not confirmed experimentally.

**Supplementary Table S4. Examples of significant clusters of genes found in the cargo DNA of diverse GInts.**

| Strain                             | Number of genes | Gene cluster                            | Possible function or products                    | Homologue                                           |                                                                          |
|------------------------------------|-----------------|-----------------------------------------|--------------------------------------------------|-----------------------------------------------------|--------------------------------------------------------------------------|
|                                    |                 |                                         |                                                  | Syntenic region                                     | Organism                                                                 |
| <i>Pseudomonas</i> sp. Chol1       | 6               | C211_02326/<br>C211_02351               | Biofilm formation                                | PSTAA_2727/<br>PSTAA_2720                           | <i>P. stutzeri</i> DSM 4166                                              |
|                                    | 9               | C211_02391/<br>C211_02431               | Mercury resistance                               | PSPA7_0089/<br>PSPA7_0097                           | <i>P. aeruginosa</i> PA7                                                 |
|                                    | 6               | C211_02461/<br>C211_02486               | DNA restriction and modification                 | PSTAA_0888/<br>PSTAA_0894                           | <i>P. stutzeri</i> DSM 4166                                              |
| <i>P. aeruginosa</i> PA_D16        | 7               | A6695_20500/<br>A6695_20530             | Tetracycline and aminoglycoside resistance       | coordinates 28414 to 33695<br>accession n° KM649682 | <i>Stenotrophomonas maltophilia</i><br>GZP-Sm1, Sm1-MDRGI genomic island |
|                                    | 3               | A6695_20495/<br>A6695_20485             | Chloramphenicol and aminoglycoside resistance    | ETN48_p0093/<br>ETN48_p0095                         | <i>Escherichia coli</i> O102-ST405<br>plasmid pETN48                     |
|                                    | 5               | A6695_20475/<br>A6695_20455             | Trimethoprim and quaternary compounds resistance | AM278_28040/<br>AM278_28060                         | <i>Klebsiella pneumoniae</i><br>UCLAOXA232KP plasmid                     |
| <i>P. denitrificans</i> ATCC 13867 | 6               | H681_04460/<br>H681_04435               | Transporter systems                              | PP_3954/<br>PP_3959                                 | <i>P. putida</i> KT2440                                                  |
| <i>P. fragi</i> NRRL B-727         | 8               | SAMN05216594_3835/<br>SAMN05216594_3842 | Copper resistance                                | PVE_R1G6098/<br>PVE_R1G6092                         | <i>P. veronii</i> 1YdBTEX2                                               |
| <i>P. moraviensis</i> R28-S        | 6               | PMO01_23485/<br>PMO01_23510             | Phosphite transport                              | PA2G_01873/<br>PA2G_01878                           | <i>P. aeruginosa</i> 2192                                                |
| <i>P. stutzeri</i> DSM 4166        | 7               | PSTAA_0888/<br>PSTAA_0894               | Nickel transport                                 | Psest_0941/<br>Psest_0936                           | <i>P. stutzeri</i> RCH2                                                  |
| <i>Pseudomonas syringae</i>        |                 |                                         |                                                  |                                                     |                                                                          |

|                                      |    |                               |                                     |                               |                                                    |
|--------------------------------------|----|-------------------------------|-------------------------------------|-------------------------------|----------------------------------------------------|
| pv. phaseolicola 1448A               | 22 | PSPPH_4299/<br>PSPPH_4319     | Phaseolotoxin<br>production         | -                             | <i>P. syringae</i> pv. <i>syringae</i><br>CFBP3388 |
| pv. tomato DC3000                    | 17 | PSPTO_4608/<br>PSPTO_4624     | Bacterial fitness                   | Psyr_1475/<br>Psyr_1491       | <i>P. syringae</i> pv. <i>syringae</i> B728a       |
| <i>Shewanella baltica</i> BA175      | 4  | Sbal175_0670/<br>Sbal175_0673 | Insecticidal toxin<br>complex       | Sbal678_0614/<br>Sbal678_0617 | <i>Shewanella baltica</i> OS678                    |
| <i>Teredinibacter turnerae</i> T7902 | 3  | YUK_04845/<br>YUK_04855       | Carbohydrate<br>transport           | F566_08265/<br>F566_08275     | <i>H. ganghwensis</i> DSM 17046                    |
|                                      | 3  | YUK_04920/<br>YUK_04930       | DNA restriction and<br>modification | B013_19835/<br>B013_19825     | <i>T. turnerae</i> T0609                           |

---

**Supplementary Table S5. Bacterial strains and plasmids used in this study.<sup>a</sup>**

| Strain or plasmid            | Host or place of isolation; description; synonyms                                                                                               | Source or reference      |
|------------------------------|-------------------------------------------------------------------------------------------------------------------------------------------------|--------------------------|
| <b>Bacteria</b>              |                                                                                                                                                 |                          |
| <i>Escherichia coli</i>      |                                                                                                                                                 |                          |
| NEB10-beta                   | Host for genetic manipulations.                                                                                                                 | New England Biolabs      |
| <i>Pseudomonas cannabina</i> |                                                                                                                                                 |                          |
| pv. alisalensis ES4326       | <i>Raphanus sativus</i> ; pathogen of crucifers; CFBP 1637, NCPPB 1820                                                                          | CFBP                     |
| <i>P. fluorescens</i> SBW25  | <i>Beta vulgaris</i> ; plant growth-promoting rhizobacterium.                                                                                   | <sup>1</sup>             |
| <i>P. fragi</i> B25          | Type strain; synonyms are NRRL B-25, CFBP 4556, ATCC 4973                                                                                       | CFBP                     |
| <i>P. putida</i> KT2440      |                                                                                                                                                 | M. Espinosa              |
| <i>P. stutzeri</i>           |                                                                                                                                                 |                          |
| DSM 4166 <sup>b</sup>        | Rhizosphere of <i>Sorghum mutans</i> ; Sp <sup>r</sup> .                                                                                        | DSMZ                     |
| UPN816 <sup>b</sup>          | DSM 4166 containing an Sm <sup>r</sup> /Sp <sup>r</sup> cassette inserted in the GInt, within PSTAA_0898, to evaluate the transfer of the GInt. | This work                |
| UPN821                       | DSM 4166 with an Accl site in <i>ginA</i> filled-in, resulting in a frameshift mutation changing the 76 C-terminal amino acids.                 | This work                |
| UPN823                       | DSM 4166 with the unique SacI site in <i>ginB</i> blunted, resulting in a premature stop codon in residue 300.                                  | This work                |
| UPN825                       | DSM 4166 with the unique EcoRI site in <i>ginC</i> filled-in, resulting in a premature stop codon in residue 129.                               | This work                |
| UPN828                       | DSM 4166 with <i>ginD</i> disrupted by insertion of the Gm <sup>r</sup> cassette in the unique Stul site.                                       | This work                |
| <i>P. syringae</i>           |                                                                                                                                                 |                          |
| pv. phaseolicola             |                                                                                                                                                 |                          |
| CYL314                       | <i>Phaseolus vulgaris</i> ; pathogen of bean.                                                                                                   | <sup>2</sup>             |
| 1448A                        | <i>Phaseolus vulgaris</i> ; pathogen of bean.                                                                                                   | <sup>3</sup>             |
| UPN779                       | Strain 1448A with a Sm <sup>r</sup> /Sp <sup>r</sup> cassette inserted in the Nrul site immediately after PSPPH_4320 in the Pht-PAI.            | This work                |
| pv. pisi 1704B               | <i>Pisum sativum</i> ; pathogen of pea; CFBP 2709.                                                                                              | CFBP                     |
| pv. syringae                 |                                                                                                                                                 |                          |
| B728a                        | <i>Phaseolus vulgaris</i> ; pathogen of bean, Cu <sup>r</sup> , Rif <sup>r</sup> , Sm <sup>r</sup> .                                            | G.W. Sundin <sup>4</sup> |
| UMAF0158                     | <i>Mangifera indica</i> ; pathogen of mango and tomato.                                                                                         | <sup>5</sup>             |

|                      |                                                                                                                                                                                              |           |
|----------------------|----------------------------------------------------------------------------------------------------------------------------------------------------------------------------------------------|-----------|
| UPN853               | UMAF0158 with a chromosomal insertion of IS- $\Omega$ -Km/hah.                                                                                                                               | This work |
| pv. tomato DC3000    | <i>Solanum lycopersicon</i> ; pathogen of tomato                                                                                                                                             | 6,7       |
| <b>Plasmids</b>      |                                                                                                                                                                                              |           |
| pGInt0               | Artificial construct containing the GInt from <i>P. stutzeri</i> DSM 4166, without the cargo DNA and in closed conformation, cloned in pUC57, Km <sup>r</sup> .                              | This work |
| pGInt0.1             | Plasmid recovered from <i>P. putida</i> KT2440::pGInt0; it is pGInt0, but contains three nt changes in its <i>attI</i> , making it more efficient for integration into diverse pseudomonads. | This work |
| pGInt0A              | pGInt0 digested with NcoI enzyme and religated resulting in a deletion of 657 nucleotides in <i>ginA</i> .                                                                                   | This work |
| pGInt0B              | pGInt0 with the unique AvrII site filled-in, resulting in a frame shift mutation in <i>ginB</i> .                                                                                            | This work |
| pGInt0C              | pGInt0 with the unique SexAI site filled-in, resulting in a frame shift mutation in <i>ginC</i> .                                                                                            | This work |
| pGInt0D              | pGInt0 with the Gm <sup>r</sup> cassette from pJQ200SK inserted in the unique StuI site of <i>ginD</i> .                                                                                     | This work |
| pHP45 $\Omega$       | Source of the Sm <sup>r</sup> /Sp <sup>r</sup> cassette.                                                                                                                                     | 8         |
| pJN105               | <i>araC</i> -P <sub>BAD</sub> cassette cloned in pBBR1MCS-5.                                                                                                                                 | 9         |
| pJN105:: <i>ginA</i> | <i>ginA</i> cloned in pJN105.                                                                                                                                                                | This work |
| pJN105:: <i>ginB</i> | <i>ginB</i> cloned in pJN105.                                                                                                                                                                | This work |
| pJN105:: <i>ginC</i> | <i>ginC</i> cloned in pJN105.                                                                                                                                                                | This work |
| pJN106               | P <sub>BAD</sub> :: <i>lacZ</i> derivative of pJN105, Km <sup>r</sup> .                                                                                                                      | 9         |
| pJQ200SK             | Source of the Gm <sup>r</sup> cassette.                                                                                                                                                      | 10        |
| pK18mobsacB          | Suicide mobilizable vector for marker-exchange mutagenesis in <i>Pseudomonas</i> ; <i>sacB</i> , <i>oriT</i> , Km <sup>r</sup> .                                                             | 11        |
| pSCR001              | IS- $\Omega$ -Km/hah plasmid, Mob <sup>+</sup> , Km <sup>r</sup> .                                                                                                                           | 12        |

<sup>a</sup> CFBP, Collection Française de Bactéries Phytopathogènes, France; Cu<sup>r</sup>, copper resistance; DSMZ, German Collection of Microorganisms and Cell Cultures, Germany; Gm<sup>r</sup>, gentamicin resistance; Km<sup>r</sup>, kanamycin resistance; NCPPB, National Collection of Plant Pathogenic Bacteria, UK; Rif<sup>r</sup>, rifampicin resistance; Sm<sup>r</sup>, streptomycin resistance; Sp<sup>r</sup>, spectinomycin resistance.

<sup>b</sup> *P. stutzeri* DSM 4166 is resistant to no more than 50  $\mu$ g spectinomycin/ml, whereas UPN816 is resistant to 200  $\mu$ g spectinomycin/ml.

**Supplementary Table S6. Primers used in this study.**

| From       | Primer name                | Sequence                          | Fragment <sup>a</sup>                                                                                     | Ref <sup>b</sup> |
|------------|----------------------------|-----------------------------------|-----------------------------------------------------------------------------------------------------------|------------------|
| pJQ200SK   | Gm_pJQ200_F                | GCAAAAGAAAATGCCGATG               | Gm <sup>R</sup> cassette                                                                                  |                  |
|            | Gm_pJQ200_R                | CCTTGCCGTAGAAGAACAGC              |                                                                                                           |                  |
| Pfu SBW25  | GIntO_R_SBw                | CACCACAGCAGGTAGGAAGTC             | with fasout_stz_4, amplification of the insertion of pGInt0 with GIntO_R_SBw amplification of <i>attB</i> |                  |
|            | Fasbor_LL3_SB              | CAGGTAGCCGATGTTTCAGGT             |                                                                                                           |                  |
| Ppu KT2440 | GIntO_R_put                | GAACGCAATGACGACGGATG              | with fasout_stz_4, amplification of the insertion of pGInt0 with Ptz-RNA-F1 amplification of <i>attB</i>  |                  |
|            | Fasbor_RR3_put             | CGGATTCTTCAGGCTCTGTG              |                                                                                                           |                  |
| Pph 1448A  | fas_intClon_F <sup>c</sup> | <u>ACTAGTCTCACCTATGGCAACCCAAT</u> | Pht-PAI                                                                                                   |                  |
|            | fas_intClon_R              | TTGATGTCCAGTTCGACCAA              |                                                                                                           |                  |
|            | fasout_1                   | ATGTCCAAGGTTTGCTTGCT              | Round 1 <i>attI</i>                                                                                       |                  |
|            | fasout_2                   | TAGCTGAAGGTTCTGCGTGA              |                                                                                                           |                  |
|            | fasout_3                   | GCTGTTTCGAGGTGAGAAATG             | Round 2 <i>attI</i>                                                                                       |                  |
|            | fasout_4                   | CTGGTACGAACTGACCATCG              |                                                                                                           |                  |
|            | fasbor_LL2                 | ATTCTTGCGACTGCATTTCT              | <i>attB</i>                                                                                               | 13               |
|            | fasbor_RR                  | CTGTCACCGACAATGTCACC              | Round 1 <i>attB</i> with fasbor_LL2                                                                       | 13               |
|            | fasbor_RR2                 | TGTTCTGACTGCTGGACTG               | Round 2 <i>attB</i> with fasbor_LL2                                                                       | 13               |
| Ppi 1704B  | fasout_pisi_2              | ACCCAAAATCAGCAAAGC                | <i>attI</i> with fasout_1                                                                                 |                  |
|            | fasout_pisi_4              | AAGATGCTGTACAGGCTCGAAAG           | <i>attI</i> with fasout_3                                                                                 |                  |
|            | FAS23F_pisi                | TCAGAAGACTCCGTGCTCG               | Internal fragment of cargo DNA                                                                            |                  |
|            | FAS25F2                    | TCAAGGCGGAAAAGAGTGTC              | Internal fragment of cargo DNA                                                                            |                  |
|            | FAS27F                     | TGGTCATGGACACTCTTTTCC             | Internal fragment of cargo DNA                                                                            |                  |
|            | FAS27R                     | GCACTGGATTACCTCCAAGG              | Internal fragment of cargo DNA                                                                            |                  |
| Pto DC3000 | fasout_To_1                | GCTCAAGCACAATAAGATGCTC            | Round 1 <i>attI</i>                                                                                       |                  |
|            | fasout_To_2                | CAATCAAGTAAACCCATTCCAC            |                                                                                                           |                  |
|            | fasout_To_3                | ACGAGCACCATTCAATCTG               | Round 2 <i>attI</i>                                                                                       |                  |
|            | fasout_To_4                | TTCGGCGGAGAGTGAGATTAC             |                                                                                                           |                  |
| Pph CYL314 | fasout_CYL_1               | TGAGGGCGCTGTTCTAGATG              | Round 1 <i>attI</i>                                                                                       |                  |
|            | fasout_CYL_2               | GGTTAGCCAGTCCACTCTTG              |                                                                                                           |                  |
|            | fasout_CYL_3               | AACACAGCCAGATGCTCAAG              | Round 2 <i>attI</i>                                                                                       |                  |
|            | fasout_CYL_4               | AATGCGGGGACTGAAACATC              |                                                                                                           |                  |
| Pfr B25    | fasout_frg_1               | GCTGTTTCGAGGCGAGAAATC             | Round 1 <i>attI</i>                                                                                       |                  |
|            | fasout_frg_2               | GACAGCGCCTTCATCAAACC              |                                                                                                           |                  |
|            | fasout_frg_3               | AGCAGCTTTCTACGAGCACC              | Round 2 <i>attI</i>                                                                                       |                  |

|                |                                    |                                              |
|----------------|------------------------------------|----------------------------------------------|
| fasout_frg_4   | ATAGGCGAGCACATTCAAGC               |                                              |
| fasbor_frg_1   | TCCACAGGCAGCAGATTGAG               | Round 1 <i>attB</i>                          |
| fasbor_frg_2   | TCGGCGTAAACCTGATCCAG               |                                              |
| fasbor_frg_3   | GTAATTGATGCTGGCCTGGC               | Round 2 <i>attB</i>                          |
| farbor_frg_4   | TCTTCCACCACTTCGCGTAC               |                                              |
| Pca ES4326     |                                    |                                              |
| fasbor_mac_R2  | CTGCATTGGGGTAGCTTTGC               | Round 1 <i>attB</i><br>with fasbor_LL2       |
| fasbor_mac_R4  | CTGGAGTTATTCAAGGCGCG               | Round 2 <i>attB</i><br>with fasbor_LL2       |
| Mac_Ass_R1     | GTTCTTGCTGCACCTGGTC                | Internal fragment of<br>cargo DNA            |
| Mac_Ass_F1     | CCTGTTTCACAGCTTCAAAGG              |                                              |
| Mac_Ass_F2     | GCCTCACATTAATTGCGAATG              | Internal fragment of<br>cargo DNA            |
| Mac_Ass_R2     | AACACCTGCAGCCTAAATCG               |                                              |
| Pst DSM4166    |                                    |                                              |
| fasout_stz_1   | GGTGAGAAATCAGATCAATGG              | Round 1 <i>attI</i>                          |
| fasout_stz_2   | GAATCACCGCTTCCTTGGTC               |                                              |
| fasout_stz_3   | TGCTCAAGGTA CTCTTGGTC              | Round 2 <i>attI</i>                          |
| fasout_stz_4   | TGCTTGAAGTCACCGCGTAG               |                                              |
| fasbor_stz_1   | CAGCAGCAGACGACACAGC                | Round 1 <i>attB</i>                          |
| fasbor_stz_2   | GCTGGACGTTGGCGTAGTC                |                                              |
| fasbor_stz_3   | AGCCAGCGCATCGAAATC                 | Round 2 <i>attB</i>                          |
| fasbor_stz_4   | GCGTACTTGTTGGTCAGCAC               |                                              |
| Ptz-RNA-F1     | CCAGGGAAGAACGACAGGG                | RT_PCR; amplicon 1<br>Fig. 2                 |
| Ptz-RNA-R1     | CCGAGTGCTCCATGGTGATG               |                                              |
| Ptz-RNA-FA     | TCAACTAGCGGTGGTCAACC               | RT_PCR; amplicon 2<br>Fig. 2                 |
| FasInt1_R      | TGCTTTCCAGCATCGTG TAG              |                                              |
| Ptz-RNA-F2     | ACATGGATGTTGCGCTGGAG               | RT_PCR; amplicon 3<br>Fig. 2                 |
| Ptz-RNA-R2     | GTTGACTGAATGACTGGCCG               |                                              |
| Ptz-RNA-FB     | TCACGGGCACTTAGGATTCG               | RT_PCR; amplicon 4<br>Fig. 2                 |
| Ptz-RNA-Rb     | GGCACATTCTCAATGGCTGC               |                                              |
| Ptz-RNA-F3     | TGTA CTCCAATCACCGAGCG              | RT_PCR; amplicon 5<br>Fig. 2                 |
| Ptz-RNA-R3     | TGAAGCTACAGCCGTCGAAG               |                                              |
| Ptz-RNA_FC2    | TGAGAGCCATGATCGCACTG               | RT_PCR; amplicon 6<br>Fig. 2                 |
| Ptz-RNA-RC2    | AGA ACTCTGATCGCGT CACG             |                                              |
| Ptz-RNA-F4     | CGATAACGGATGGACGCTGG               | RT_PCR; amplicon 7<br>Fig. 2                 |
| FasInt4_R1     | TCTGACCATTCTCAATCAGC               |                                              |
| Ptz-RNA-FD     | TCGCCAGTCCCTGATGAAAC               | RT_PCR; amplicon 8<br>Fig. 2                 |
| Ptz-RNA-RD     | CATATCCGCATTGGCTTGCC               |                                              |
| Ptz-RNA-RD2    | TTCATGGCTGGATCGGTCTG               | RT_PCR; amplicon 9<br>Fig. 2 with Ptz-RNA-FD |
| RNA-stz-ABC-F  | TCAAGATCGGCAACTACGAG               | RT_PCR;<br>ABC transporter                   |
| RNA-stz-ABC-R  | GAGGAACCAGCGGTCTGTG                |                                              |
| RNA-stz-rpoD-R | AGCACGGATCTGGTTCAGAG               | Internal fragment of<br><i>ropD</i>          |
| RNA-stz-rpoD-F | GGACGACGACGAAGAAGAAG               |                                              |
| RNA-stz-gyrb-R | TTGAAGCTGTGTTCCACTG                | Internal fragment of<br><i>gyrB</i>          |
| RNA-stz-gyrb-F | ACGCAGATCCATTCAAACC                |                                              |
| ginA-F         | <u>ACTAGT</u> CAGTCGGTGCCCATGACTAT | Entire <i>ginA</i> gene.                     |
| ginA-R         | <u>ACTAGT</u> GTTGACTGAATGACTGGCCG | Used for cloning                             |

|            |                                    |                                 |
|------------|------------------------------------|---------------------------------|
| ginB-F     | <u>ACTAGTACATGGATGTTTCGGCTGGAG</u> | Entire <i>ginB</i> gene.        |
| ginB-R     | <u>ACTAGTTGAAGCTACAGCCGTCGAAG</u>  | Used for cloning                |
| ginC-F     | <u>ACTAGTTGTA</u> CTCCAATCACCGAGCG | Entire <i>ginC</i> gene.        |
| ginC-R     | <u>ACTAGTTCTG</u> ACCATTCTCAATCAGC | Used for cloning                |
| ginD-F     | <u>ACTAGTCGATAACGGATGGACGCTGG</u>  | Entire <i>ginD</i> gene.        |
| ginD-R     | <u>ACTAGTTTCATGGCTGGATCGGTCTG</u>  | Used for cloning                |
| ginA_mutF  | G <u>CATCTGGCTGTGTTT</u> GAGG      | With Ptz-RNA-Rb for mutagenesis |
| ginB_mut_R | TTGGCAA <u>ACTCCGTGAAGGG</u>       | With Ptz-RNA-F2 for mutagenesis |
| ginD_mutR  | GCCATTCGCACGATTACGAC               | With Ptz-RNA-FC for mutagenesis |

<sup>a</sup> *attI* and *attB* refer to the specific amplicons obtained from the circular intermediate and from the empty chromosomal site, respectively, resulting from excision of GInts. The *attI* of GInt7 in *P. cannabina* pv. *alisalensis* ES4326 was detected using primers *fasout\_pisi\_2* and *fasout\_CYL\_3* in the first round, and primers *fasout\_stz\_3* and *fasout\_pisi\_2* for the second round. Abbreviations are: Pfu, *P. fluorescens*; Ppu, *P. putida*; Pph, *P. syringae* pv. *phaseolicola*; Pca, *P. cannabina* pv. *alisalensis*; Pfr, *P. fragi*; Pto, *P. syringae* pv. *tomato*; Ppi, *P. syringae* pv. *pisi*; Pst, *P. stutzeri*.

<sup>b</sup> Unless specifically indicated, all primers were designed in this study.

<sup>c</sup> The Spel adaptor of primers is underlined.

## References

- De Leij, F., Sutton, E. J., Whipps, J. M., Fenlon, J. S. & Lynch, J. M. Impact of Field Release of Genetically Modified *Pseudomonas fluorescens* on Indigenous Microbial Populations of Wheat. *Appl. Environ. Microbiol.* **61**, 3443-53 (1995).
- Rico, A. *et al.* Nontoxigenic strains of *P. syringae* pv. *phaseolicola* are a main cause of halo blight of beans in Spain and escape current detection methods. *Phytopathology* **93**, 1553-1559 (2003).
- Joardar, V. *et al.* Whole-genome sequence analysis of *Pseudomonas syringae* pv. *phaseolicola* 1448A reveals divergence among pathovars in genes involved in virulence and transposition. *J. Bacteriol.* **187**, 6488-6498 (2005).
- Feil, H. *et al.* Comparison of the complete genome sequences of *Pseudomonas syringae* pv. *syringae* B728a and pv. *tomato* DC3000. *Proc. Natl. Acad. Sci.* **102**, 11064-9 (2005).
- Martínez-García, P. M. *et al.* Bioinformatics analysis of the complete genome sequence of the mango tree pathogen *Pseudomonas syringae* pv. *syringae* UMAF0158 reveals traits relevant to virulence and epiphytic lifestyle. *PLoS ONE* **10**, e0136101, doi:10.1371/journal.pone.0136101 (2015).
- Cuppels, D. A. & Ainsworth, T. Molecular and physiological characterization of *Pseudomonas syringae* pv. *tomato* and *Pseudomonas syringae* pv. *maculicola* strains that produce the phytotoxin coronatine. *Appl. Environ. Microbiol.* **61**, 3530-3536 (1995).
- Buell, C. R. *et al.* The complete genome sequence of the *Arabidopsis* and tomato pathogen *Pseudomonas syringae* pv. *tomato* DC3000. *Proc. Natl. Acad. Sci.* **100**, 10181-10186, doi:10.1073/pnas.1731982100 (2003).
- Prentki, P. & Krisch, H. M. In vitro insertional mutagenesis with a selectable DNA fragment. *Gene* **29**, 303-313 (1984).



9. Newman, J. R. & Fuqua, C. Broad-host-range expression vectors that carry the l-arabinose-inducible *Escherichia coli* *araBAD* promoter and the *araC* regulator. *Gene* **227**, 197-203, doi:10.1016/S0378-1119(98)00601-5 (1999).
10. Quandt, J. & Hynes, M. F. Versatile suicide vectors which allow direct selection for gene replacement in Gram-negative bacteria. *Gene* **127**, 15-21 (1993).
11. Schäfer, A. *et al.* Small mobilizable multi-purpose cloning vectors derived from the *Escherichia coli* plasmids pK18 and pK19: selection of defined deletions in the chromosome of *Corynebacterium glutamicum*. *Gene* **145**, 69-73, doi:http://dx.doi.org/10.1016/0378-1119(94)90324-7 (1994).
12. Giddens, S. R. *et al.* Mutational activation of niche-specific genes provides insight into regulatory networks and bacterial function in a complex environment. *Proc. Natl. Acad. Sci.* **104**, 18247-18252, doi:10.1073/pnas.0706739104 (2007).
13. Murillo, J. *et al.* Variation in conservation of the cluster for biosynthesis of the phytotoxin phaseolotoxin in *Pseudomonas syringae* suggests at least two events of horizontal acquisition. *Res. Microbiol.* **162**, 253-261, doi:10.1016/j.resmic.2010.10.011 (2011).
